# Supplementary material
Source: PubMed Central journal article supplement (PMC3505596)
Supplement: NIHMS224842-supplement-figurre.pdf [file NIHMS224842-supplement-figurre.pdf]

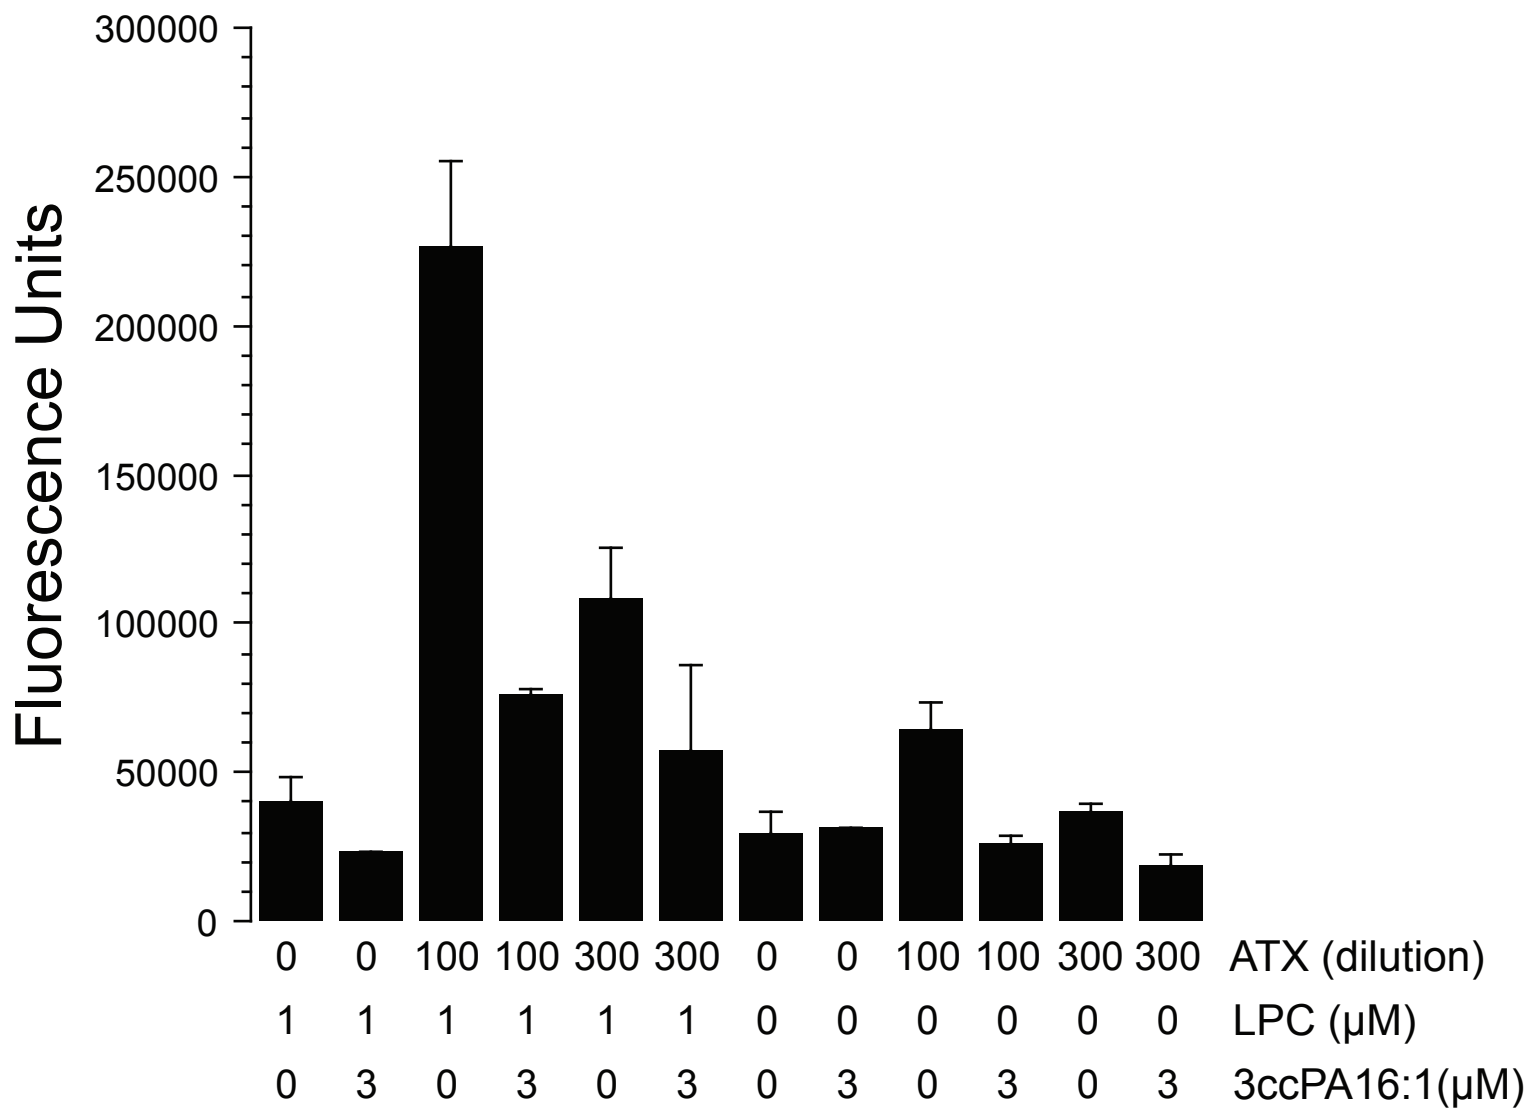

Supplemental Figure 1 Optimization of *in vitro* invasion assay conditions. The invasive potential of A2058 melanoma cells was determined using a modified Boyden chamber assay. The effect of varying amounts of purified, recombinant ATX-HA (100 or 300 fold dilution), LPC 18:1 (0 or 1 μM) and 3ccPA (0 and 3 μM) was assessed. Data are means ± range of duplicate wells.
